# Supplementary material
Source: Research Square preprint supplement (doi:10.21203/rs.3.rs-9801743/v1)
Supplement: Supplementary file 1 [file 220b090c2077e4bf296dc8e4.docx]

|  | BRCA Mutation | Coding Change |
| --- | --- | --- |
| 1 | BRCA1 | c.5266dupC |
| 2 | BRCA1 | c.4689C>G |
| 3 | BRCA1 | c.5096G>A |
| 4 | BRCA1 | c.181T>G |
| 5 | BRCA1 | c.4533_4534del |
| 6 | BRCA1 | c.181 T>G heterozygot |
| 7 | BRCA1 | c.3481_3491del11 |
| 8 | BRCA1 | c.1504_1508delTTAAA |
| 9 | BRCA1 | c.329dupA |
| 10 | BRCA1 | c.3481_3491del11 |
| 11 | BRCA1 | c.(507 4+1_5075-1)_(5193+1_5194-l)del |
| 12 | BRCA1 | c.798_799delTT heterozygot |
| 13 | BRCA1 | c.5266dupC |
| 14 | BRCA1 | c.66dupA |
| 15 | BRCA1 | c.5266dup |
| 16 | BRCA1 | c.5266dupC |
| 17 | BRCA1 | c.5266dupC |
| 18 | BRCA1 | c.5266dup |
| 19 | BRCA1 | c.5406+4A>G heterozygot |
| 20 | BRCA1 | c.66dup |
| 21 | BRCA1 | c.135-2A>G |
| 22 | BRCA1 | c.2551G> T |
| 23 | BRCA1 | c.343_344del |
| 24 | BRCA1 | c.3481_3491del11 |
| 25 | BRCA1 | c.3481_3491del11 |
| 26 | BRCA1 | c.3481 3491del11 |
| 27 | BRCA1 | c.5266dupC |
| 28 | BRCA1 | c.5266dupC |
| 29 | BRCA1 | c.5153-2delA, heterozygot |
| 30 | BRCA1 | c.5266dupC |
| 31 | BRCA1 | c.68 69del heterozygot |
| 32 | BRCA1 | c.302-2A>C |
| 33 | BRCA1 | c. 798_799del |
| 34 | BRCA1 | c.3481_3491del |
| 35 | BRCA1 | c.1687C>T |
| 36 | BRCA1 | c.181T>G heterozygot |
| 37 | BRCA1 | c.(?_-200)_(441+1_442-1)del |
| 38 | BRCA1 | c.1793T>A |
| 39 | BRCA1 | c.2411_2412del |
| 40 | BRCA1 | c.3481_3491del |
| 41 | BRCA1 | c.3018_3021del |
| 42 | BRCA1 | c.2411_2412delAG |
| 43 | BRCA1 | c.3756_3759del heterozygot |
| 44 | BRCA1 | g.(? 41256139) (41276132 ?)del, heterozygot |
| 45 | BRCA1 | c.1261G>T |
| 46 | BRCA1 | c.329dup |
| 47 | BRCA1 | c.(? _-19-1)_(441 +1_ 442-1)del |
| 48 | BRCA1 | c.2411_2412del |
| 49 | BRCA1 | c.(?_-200)_(80+1_81-l)del |
| 50 | BRCA1 | c.5266dup heterozygot |
| 51 | BRCA1 | c.(5332+1_5333-1)_(5406+1_5407-1)del |
| 52 | BRCA1 | c.3756 3759del |
| 53 | BRCA1 | c.181T>G |
| 54 | BRCA1 | c.5266dup |
| 55 | BRCA1 | c.1687C> T |
| 56 | BRCA1 | c.5266dupC |
| 57 | BRCA1 | c.4185+1G>T |
| 58 | BRCA1 | c.5266dup |
| 59 | BRCA1 | c.5096G>A |
| 60 | BRCA1 | NC_000017 .10:g.(? 41197819) (41203134 41209069)del |
| 61 | BRCA1 | c.4689C>G |
| 62 | BRCA1 | c.5164T>C |
| 63 | BRCA1 | c.5266dup |
| 64 | BRCA1 | c.(4675+1_ 4676-1)_(5277 +1_5278-l)del heterozygot |
| 65 | BRCA1 | c.628C>T |
| 66 | BRCA1 | c.5333-6T>G |
| 67 | BRCA1 | c.2411_2412del |
| 68 | BRCA1 | c.442-7T>A |
| 69 | BRCA1 | c.131G>T |
| 70 | BRCA1 | c.3481_3491del11 |
| 71 | BRCA1 | c.5377A>T |
| 72 | BRCA1 | c.1154G>A |
| 73 | BRCA1 | c.5492del |
| 74 | BRCA1 | NC_000017 .10:g.(? _ 41197697)_(41203134_ 41209069)del |
| 75 | BRCA1 | c.3700_3704del |
| 76 | BRCA1 | c.3018_3021del |
| 77 | BRCA1 | c.68_69delAG |
| 78 | BRCA1 | c.5266dup |
| 79 | BRCA1 | c.1127del |
| 80 | BRCA1 | c.181T>G |
| 81 | BRCA1 | c.3700_3704del |
| 82 | BRCA1 | c.5266dup |
| 83 | BRCA1 | c.2411_2412del |
| 84 | BRCA1 | c.(5332+1_5333-1)_(5406+1_5407-l)del |
| 85 | BRCA1 | c.(4986+1_ 4987-1)_(5074+1_5075-1)del |
| 86 | BRCA1 | c.3481 3491del |
| 87 | BRCA1 | c.1916T>A |
| 88 | BRCA1 | c.5266dup |
| 89 | BRCA1 | c.(4484+1_4485-1)_(5193+1_5194-1)del |
| 90 | BRCA1 | c.4097-2A>G |
| 91 | BRCA2 | c.6591_6592del |
| 92 | BRCA2 | c.4449del |
| 93 | BRCA2 | c.6952C> T |
| 94 | BRCA2 | c.4131_ 4132insTGAGGA heterozygot |
| 95 | BRCA2 | c.1309_1312delAAAG |
| 96 | BRCA2 | c.1296_1297delGA |
| 97 | BRCA2 | c.3637G> T |
| 98 | BRCA2 | c.5682C>G |
| 99 | BRCA2 | c.1813dupA |
| 100 | BRCA2 | c.2806_2809del |
| 101 | BRCA2 | c.1813dupA heterozygot |
| 102 | BRCA2 | c.2206del |
| 103 | BRCA2 | c.9371A>T |
| 104 | BRCA2 | c.3G>A |
| 105 | BRCA2 | c.2808 2811del |
| 106 | BRCA2 | c.1813dupA |
| 107 | BRCA2 | c.5946del |
| 108 | BRCA2 | c.5035dup heterozygot |
| 109 | BRCA2 | c.516+2T>A |
| 110 | BRCA2 | c.9371A>T |
| 111 | BRCA2 | c.9371A>T |
| 112 | BRCA2 | c.1636del |
| 113 | BRCA2 | c.1813dupC |
| 114 | BRCA2 | c.3599 3600del heterozygot |
| 115 | BRCA2 | c.3191C>G |
| 116 | BRCA2 | c.(8953+1_8954-1)_(9117 +1_9118-1)del |
| 117 | BRCA2 | c.9371A> T |
| 118 | BRCA2 | c.7558C>T |
| 119 | BRCA2 | c.3847 3848del |
| 120 | BRCA2 | c.9435_9436del |
| 121 | BRCA2 | c.(8953+1_8954-1)_(9117+1_9118-1)del |
| 122 | BRCA2 | c.5303_5304del |
| 123 | BRCA2 | c.5164 5165del |
| 124 | BRCA2 | c.7617+2T>G |
| 125 | BRCA2 | c.67+1G>T |
| 126 | BRCA2 | c.516+2T>A |
| 127 | BRCA2 | c.7913_7917del |
| 128 | BRCA2 | c.7007G>A |
| 129 | BRCA2 | c.5217_5224del |
| 130 | BRCA2 | c.5616 5620del |
| 131 | BRCA2 | c.1389 1390del |
| 132 | BRCA2 | g.(? 32944539) (32945237 ?)dup. |
| 133 | BRCA2 | c.5217 5223del |
| 134 | BRCA2 | c.2808 2811del |
| 135 | BRCA2 | c.6405 6409del |
| 136 | BRCA2 | c.8695C> T |
| 137 | BRCA2 | c.1813dup |
| 138 | BRCA2 | c.1813delA |
| 139 | BRCA2 | c. 7863T>A |
| 140 | BRCA2 | c.9257-1G>C |
| 141 | BRCA2 | c.1813del |
| 142 | BRCA2 | c.1813dupA |
| 143 | BRCA2 | c. 7913_7917del |
| 144 | BRCA2 | c.7558C>T |
| 145 | BRCA2 | c.1813dup |
| 146 | BRCA2 | c.3500_3501del |
| 147 | BRCA2 | c.1813dup |
| 148 | BRCA2 | c.1813dup |

**Supplement Table 1** Coding change in *gBRCA*mut patients with breast cancer.

|  |  | **Patients with RRSO**  **(n = 101)** | **g*BRCA1*mut**  **(n=61)** | **g*BRCA2*mut**  **(n=40)** |
| --- | --- | --- | --- | --- |
| Age (years) (n/%) | Mean (SD) | 46.7 (±8.2) | 44.1 (±6.8) | 50.7 (±8.2) |
|  | <35 | 8 (7.9) | 7 (11.5) | 1 (2.5) |
| ≥35, <50 | 59 (58.4) | 39 (63.9) | 20 (50.0) |
| ≥50, <70 | 31 (30.7) | 15 (24.6) | 16 (40.0) |
| ≥70 | 3 (3.0) | 0 | 3 (7.5) |
| No information available | 0 | 0 | 0 |
| Metachronous HGSC (n/%) | Yes | 3 (2.9) | 2 (3.3) | 1 (2.5) |
|  | - Before BC | 0 | 0 | 0 |
| - Synchronous | 0 | 0 | 0 |
| - After BC | 3 (100) | 2 (100) | 1 (100) |
| No | 98 (97.1) | 59 (96.7) | 39 (97.5) |
| BC Relapse (n/%) | Yes | 16 (15.8) | 8 (13.1) | 8 (20.0) |
|  | - Local | 7 (43.8) | 4 (50.0) | 3 (37.5) |
| - Local + Advanced | 1 (6.2) | 1 (12.5) | 0 |
| - Advanced | 8 (50.0) | 3 (37.5) | 5 (62.5) |
| De novo mBC | 4 (4.0) | 1 (1.6) | 3 (7.5) |
| No | 81 (80.2) | 52 (85.3) | 29 (72.5) |
| Time to relapse (months) (n/%) | ≤18 | 1 (6.3) | 1 (12.5) | 0 |
|  | >18, ≤36 | 4 (25.0) | 2 (25.0) | 2 (25.0) |
| >36, ≤60 | 5 (31.2) | 3 (37.5) | 2 (25.0) |
| >60 | 6 (37.5) | 2 (25.0) | 4 (50.0) |
| UICC Stage (n/%) | 0 (DCIS) | 1 (1.0) | 0 | 1 (2.5) |
|  | I | 35 (34.6) | 18 (29.5) | 17 (42.5) |
| II | 45 (44.5) | 31 (50.8) | 14 (35.0) |
| III | 4 (4.0) | 1 (1.6) | 3 (7.5) |
| IV | 2 (2.0) | 1 (1.6) | 1 (2.5) |
| No information available | 14 (13.9) | 10 (16.4) | 4 (10.0) |
| BC subtype (n/%) | HR pos | 36 (36.0) | 14 (22.9) | 22 (56.4) |
|  | HER2 pos | 10 (10.0) | 4 (6.6) | 6 (15.4) |
| TNBC | 52 (52.0) | 41 (67.2) | 11 (28.2) |
| No informations | 2 (2.0) | 2 (3.3) | 0 |

Supplement Table 2 Patient and tumor characteristics with RRSO, showing mean and standard deviation or frequency and percentage for g*BRCA1*mut/g*BRCA2*mut.

|  |  | **Patients without RRSO**  **(n = 47)** | **g*BRCA1*mut**  **(n = 29)** | **g*BRCA2*mut**  **(n = 18)** |
| --- | --- | --- | --- | --- |
| Age (years) (n/%) | Mean (SD) | 48.2 (±16.2) | 48.6 (±14.1) | 47.5 (±15.0) |
|  | <35 | 12 (25.5) | 8 (27.6) | 4 (22.2) |
| ≥35, <50 | 12 (25.5) | 7 (24.1) | 5 (27.8) |
| ≥50, <70 | 15 (31.9) | 10 (34.5) | 5 (27.8) |
| ≥70 | 6 (12.8) | 3 (10.3) | 3 (16.7) |
| No information available | 2 (4.3) | 1 (3.5) | 1 (5.5) |
| Metachronous HGSC (n/%) | Yes | 7 (14.9) | 4 (13.8) | 3 (16.7) |
|  | - Before BC | 2 (28.6) | 2 (50.0) | 0 |
| - Synchronous | 1 (14.2) | 1 (25.0) | 0 |
| - After BC | 4 (57.2) | 1 (25.0) | 3 (100) |
| No | 40 (85.1) | 25 (86.2) | 15 (83.3) |
| BC Relapse (n/%) | Yes | 11 (23.4) | 6 (20.7) | 5 (27.8) |
|  | - Local | 4 (36.3) | 3 (50.0) | 1 (20.0) |
| - Local + Advanced | 2 (18.2) | 0 | 2 (40.0) |
| - Advanced | 5 (45.5) | 3 (50.0) | 2 (40.0) |
| De novo mBC | 5 (10.6) | 3 (10.3) | 2 (11.1) |
| No | 31 (66.0) | 20 (69.0) | 11 (61.1) |
| Time to relapse (months) (n/%) | ≤18 | 2 (18.2) | 2 (33.3) | 0 |
|  | >18, ≤36 | 6 (45.4) | 3 (50.0) | 3 (60.0) |
| >36, ≤60 | 1 (18.2) | 1 (16.7) | 0 |
| >60 | 2 (18.2) | 0 | 2 (40.0) |
| UICC Stage (n/%) | 0 (DCIS) | 1 (2.2) | 0 | 1 (5.6) |
|  | I | 9 (19.1) | 5 (17.2) | 4 (22.2) |
| II | 20 (42.5) | 14 (48.3) | 6 (33.3) |
| III | 4 (8.5) | 3 (10.3) | 1 (5.6) |
| IV | 6 (12.8) | 5 (17.2) | 1 (5.6) |
| No information available | 7 (14.9) | 2 (6.9) | 5 (27.8) |
| BC subtype (n/%) | HR pos | 20 (41.3) | 8 (27.6) | 12 (70.6) |
|  | HER2 pos | 3 (8.5) | 3 (10.3) | 0 |
| TNBC | 18 (36.2) | 16 (55.2) | 2 (11.8) |
| No informations | 5 (13.0) | 2 (6.9) | 3 (17.6) |

**Supplement Table 3** Patient and tumor characteristics without RRSO, showing mean and standard deviation or frequency and percentage g*BRCA1*mut/g*BRCA2*mut.

|  |  | **Patients with RRSO**  **(n = 101)** | **g*BRCA1*mut**  **(n=61)** | **g*BRCA2*mut**  **(n=40)** |
| --- | --- | --- | --- | --- |
| Breast Operation (n/%) | Breast conserving therapy | 25 (24.8) | 14 (23.0) | 11 (27.5) |
|  | Mastectomy | 73 (72.3) | 46 (75.4) | 27 (67.5) |
| No information available | 3 (2.9) | 1 (1.6) | 2 (5.0) |
| Reconstruction (n/%) | Total | 73 | 46 | 27 |
|  | Subcutaneous Implants | 15 (20.5) | 9 (19.6) | 6 (22.2) |
| Subpectoral Implants | 23 (31.5) | 18 (39.1) | 5 (18.5) |
| No implants | 35 (48.0) | 19 (41.3) | 16 (59.3) |
| Time to operation (months) (n/%) | ≤12 | 52 (51.5) | 30 (49.2) | 22 (55.0) |
|  | >12 - ≤24 | 23 (22.8) | 13 (21.3) | 10 (25.0) |
| >24 - ≤60 | 9 (8.9) | 6 (9.8) | 3 (7.5) |
| >60 | 16 (15.8) | 12 (19.7) | 4 (10.0) |
| Before BC | 1 (1.0) | 0 | 1 (2.5) |

**Supplement Table 4** BC risk-reducing operations in *gBRCA1*mut and *gBRCA2*mut BC patients with RRSO.

|  |  | **Patients without RRSO**  **(n = 47)** | **g*BRCA1*mut**  **(n = 29)** | **g*BRCA2*mut**  **(n = 18)** |
| --- | --- | --- | --- | --- |
| Breast Operation (n/%) | Breast conserving therapy | 12 (25.5) | 5 (17.2) | 7 (38.9) |
|  | Mastectomy | 25 (53.2) | 18 (62.1) | 7 (38.9) |
| No information available | 10 (21.3) | 6 (20.7) | 4 (22.2) |
| Reconstruction (n/%) | Total | 25 | 18 | 7 |
|  | Subcutaneous Implants | 6 (24.0) | 5 (27.8) | 1 (14.3) |
| Subpectoral Implants | 8 (21.0) | 5 (27.8) | 3 (42.9) |
| No implants | 11 (55.0) | 8 (44.4) | 3 (42.9) |

**Supplement Table 5** BC risk-reducing operations in *gBRCA1*mut and *gBRCA2*mut BC patients without RRSO.
